# Supplementary material for: Influence of defects on the linear and nonlinear optical properties of Cu-doped rutile TiO2microflowers
Source: Royal Society of Chemistry journal article supplement (doi:10.1039/d3cp05693g), 2024-01-01
Supplement: d3cp05693g1.pdf [file d3cp05693g1.pdf]

## Supporting Information

### Influence of defects on linear and nonlinear optical properties of Cu doped rutile TiO<sub>2</sub> microflowers

Subhashree Sahoo,<sup>a</sup> Km. Surbhi,<sup>a</sup> Sourav Bhakta,<sup>a</sup> Ritwick Das,<sup>a,b</sup> and Pratap K. Sahoo<sup>a,c,\*</sup>

<sup>a</sup>School of Physical Sciences, National Institute of Science Education and Research (NISER) Bhubaneswar, An OCC of Homi Bhabha National Institute, Jatni, Odisha-752050, India

<sup>b</sup>Present address: The Optics and Photonics Center, Indian Institute of Technology, Delhi, Hauz Khas, 110016, Delhi, India

<sup>c</sup>Center for Interdisciplinary Sciences (CIS), NISER Bhubaneswar, HBNI, Jatni-752050, Odisha,

E-mail: pratap.sahoo@niser.ac.in

The crystallite size (D) of undoped and Cu doped TiO<sub>2</sub> is calculated using Debye–Scherrer’s formula as given below

$$D = \frac{0.9 \lambda}{\beta \cos \theta} \quad (1)$$

Where, D is the crystallite size,  $\lambda$  is the wavelength of incident X-ray (1.5418 Å),  $\beta$  is the full-width half maxima (FWHM) in radian and  $\theta$  is the angle of diffraction.

The dislocation density is calculated using the relation,

$$\delta = \frac{1}{D^2} \quad (2)$$

Further by using the Bragg’s diffraction law as shown in equation (4), the value of  $d_{110}$  is calculated and presented in Table S1.

$$2d \sin \theta = n \lambda \quad (3)$$

The value of  $d_{110}$  and the equation (5) is used for the calculation of lattice parameter “a”. As rutile TiO<sub>2</sub> has a tetragonal structure, “a”=”b”.

Similarly,  $d_{101}$  is calculated using 101 peak. The value of “c” is obtained by using lattice parameter “a” and  $d_{101}$ .

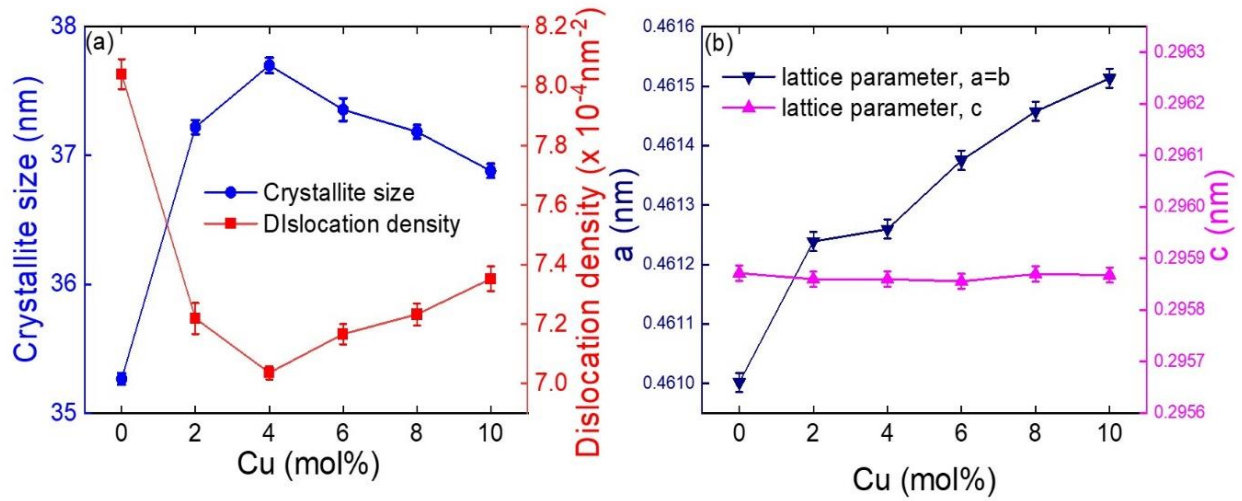

**Figure S1:** (a) Variation of crystallite size (left side) and dislocation density (right side) with Cu concentration. (b) Variation of lattice parameter with Cu concentration.

The value of microstrain ( $\epsilon$ ), calculated using the relation is obtained using equation (3), the lattice parameters (a=b, c) are presented in Table 1.

$$\epsilon = \frac{\beta}{4 \tan \theta} \quad (4)$$

**Table S1:** Values of interplanar spacing  $d_{110}$  and microstrain for undoped and Cu doped  $\text{TiO}_2$ .

| Samples                | $d_{110}$ (nm) | microstrain |
|------------------------|----------------|-------------|
| Undoped $\text{TiO}_2$ | 0.32602        | 0.004113    |
| 2% Cu: $\text{TiO}_2$  | 0.32619        | 0.004114    |
| 4% Cu: $\text{TiO}_2$  | 0.32620        | 0.004116    |
| 6% Cu: $\text{TiO}_2$  | 0.32629        | 0.004121    |
| 8% Cu: $\text{TiO}_2$  | 0.32634        | 0.004132    |
| 10% Cu: $\text{TiO}_2$ | 0.32638        | 0.004135    |

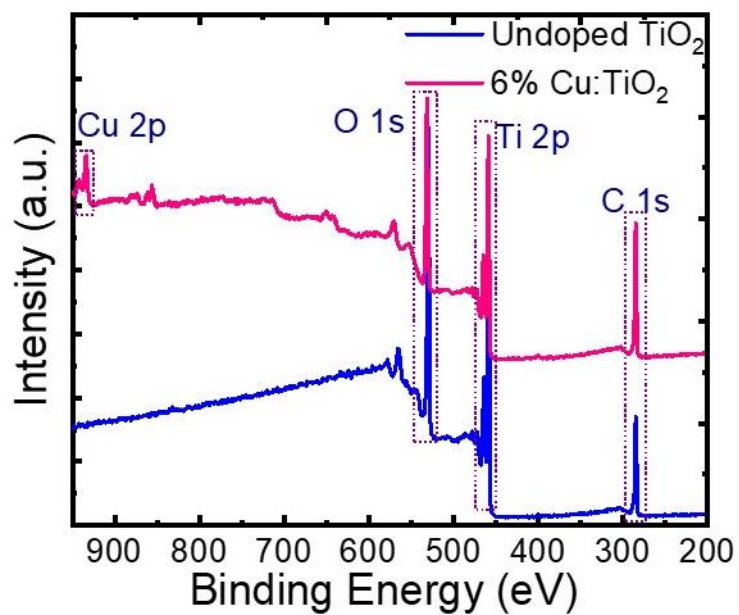

**Figure S2:** XPS survey spectra of undoped and 6% Cu doped TiO<sub>2</sub>

**Table S2:** %Area of the peaks

| Peak   | Undoped TiO <sub>2</sub> | 6% Cu doped TiO <sub>2</sub> |
|--------|--------------------------|------------------------------|
| 529.59 | 80.84                    | 68.65                        |
| 530.71 | 7.63                     | 9.97                         |
| 531.56 | 8.66                     | 16.47                        |
| 532.49 | 2.86                     | 4.90                         |
